# Supplementary material
Source: Springer Nature journal article supplement (https://www.springermedizin.de/resource/supplementary/12906_2012_1327_MOESM2_ESM.pdf/9522434)

A) → DCFH-DA

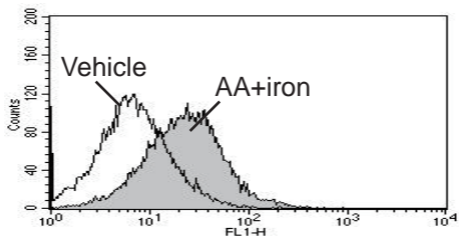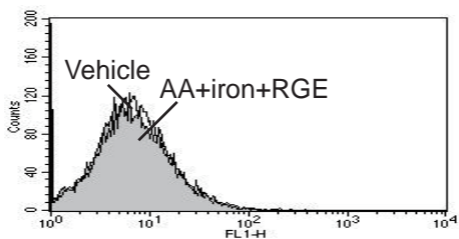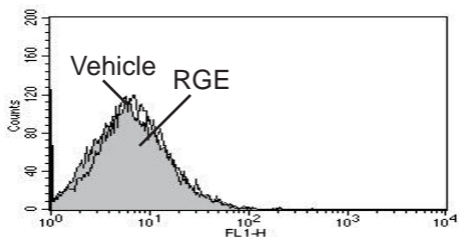

B)

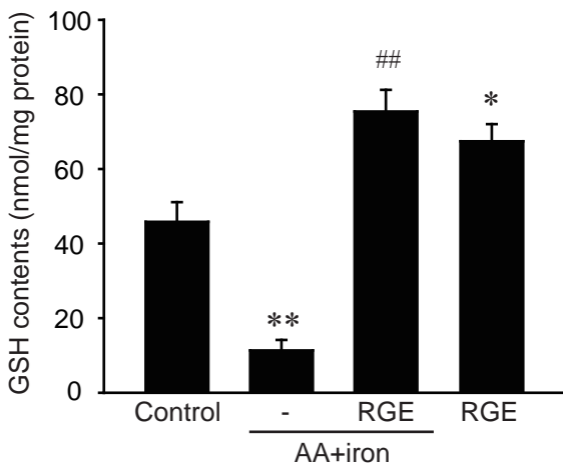

Supplement: MOESM2 [file 9522434]
